1 Extending FreeSurfer to estimate sulcal morphology

2 Christopher R. Madan

3 School of Psychology

4 University of Nottingham

5 Nottingham, United Kingdom

6

7 Corresponding author:

8 Christopher R. Madan

9 School of Psychology, University of Nottingham

10 Nottingham, NG7 2RD, United Kingdom

11 christopher.madan@nottingham.ac.uk

12 Abstract

13 While it is well established that cortical morphology differs in relation to a variety of  
14 inter-individual factors, it is often characterized using estimates of volume, thickness,  
15 surface area, or gyrification. Here I developed a computational approach for estimating  
16 sulcal width and depth that relies on cortical surface reconstructions output by  
17 FreeSurfer. While other approaches for estimating sulcal morphology exist, studies  
18 often are require the use of multiple brain morphology programs that have been  
19 shown to differ in their approaches to localize sulcal landmarks, yielding  
20 morphological estimates based on inconsistent boundaries. To demonstrate the  
21 approach, sulcal morphology was estimated in three large sample of adults across the  
22 lifespan, in relation to aging. A fourth sample is additionally used to estimate  
23 test-retest reliability of the approach. This toolbox is now made freely available as  
24 supplemental to this paper: <https://cmadan.github.io/calcSulc/>.

25

26 **Keywords:** sulcal width; sulcal depth; age; cortical structure; atrophy; gyrification;  
27 cerebral sulci

## 28 Extending FreeSurfer to estimate sulcal morphology

### 29 **1 Introduction**

30 Cortical structure differs between individuals. It is well known that cortical thickness  
31 generally decreases with age (Fjell et al., 2009; Hogstrom et al., 2013; Hutton et al., 2009;  
32 Lemaitre et al., 2012; Madan & Kensinger, 2016, 2018; McKay et al., 2014; Salat et al.,  
33 2004; Sowell et al., 2003, 2007); however, a more visually prominent difference is the  
34 widening of sulci, sometimes described as “sulcal prominence” (Coffey et al., 1992;  
35 Drayer, 1988; Jacoby et al., 1980; Laffey et al., 1984; Tomlinson et al., 1968; Yue et al.,  
36 1997). In the literature, this measure has been referred to using a variety of names,  
37 including sulcal width, span, dilation, and enlargement, as well as fold opening. With  
38 respect to aging and brain morphology, sulcal width has been assessed qualitatively by  
39 clinicians as an index of cortical atrophy (Coffey et al., 1992; Drayer, 1988; Laffey et al.,  
40 1984; Pasquier et al., 1996; Scheltens et al., 1997; Tomlinson et al., 1968). An illustration  
41 of age-related differences in sulcal morphology is shown in Figure 1.

42 Using quantitative approaches, sulcal width has been shown to increase with age  
43 (Kochunov et al., 2005, 2008; Liu et al., 2010, 2013) likely relating to subsequent  
44 findings of age-related decreases in cortical gyrification (Cao et al., 2017; Hogstrom et  
45 al., 2013; Madan & Kensinger, 2016, 2018; Madan, 2018a). Sulcal widening has also  
46 been shown to be associated with decreases in cognitive abilities (Liu et al., 2011) and  
47 physical activity (Lamont et al., 2014). With respect to clinical conditions, increased  
48 sulcal width has been found in dementia patients relative to healthy controls  
49 (Andersen et al., 2015; Hamelin et al., 2015; Huckman et al., 1975; Liu et al., 2012; Ming  
50 et al., 2015; Plocharski & Østergaard, 2016; Reiner et al., 2012), as well as with  
51 schizophrenia patients (Largen et al., 1984; Palaniyappan et al., 2015; Rieder et al., 1979)  
52 and mood disorders (Elkis et al., 1995).

53 One of the most common programs for conducting cortical surface analyses is  
54 FreeSurfer (Fischl, 2012). Unfortunately, though FreeSurfer reconstructs cortical  
55 surfaces, it does not estimate sulcal width or depth, leading researchers to use

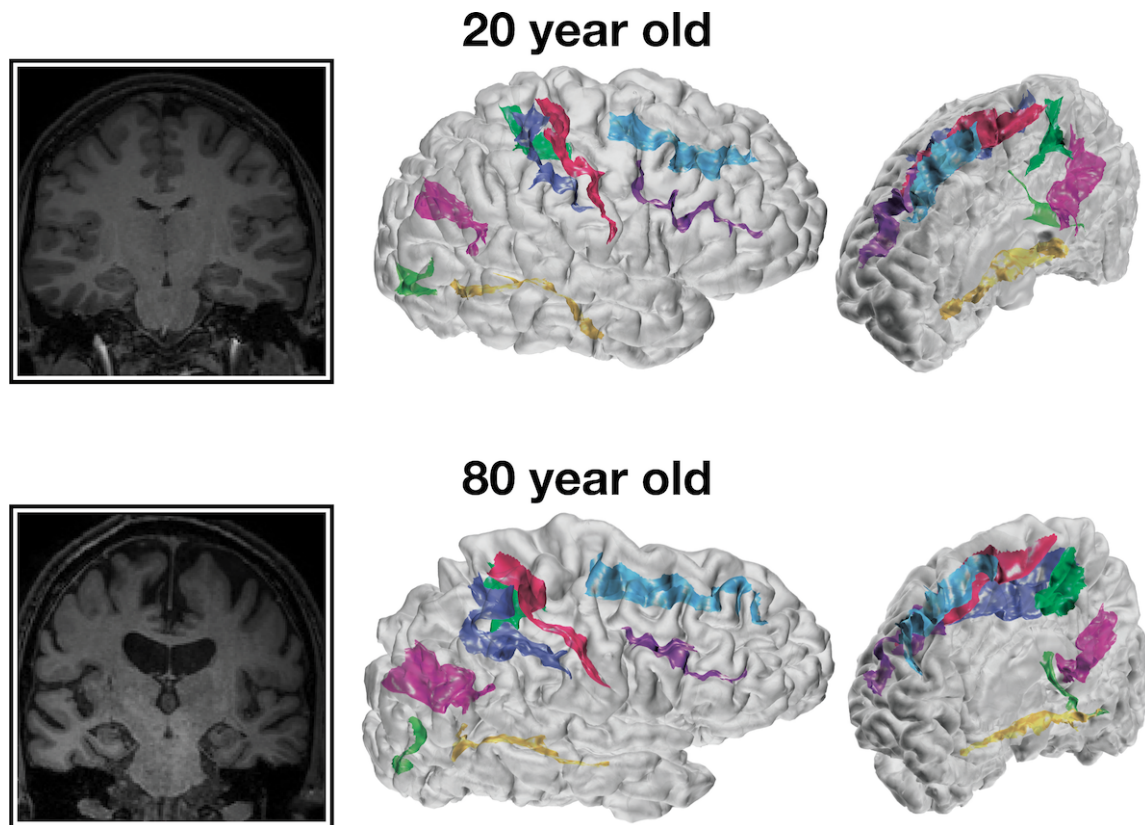

Figure 1. Representative coronal slices and cortical surfaces with sulcal identification for 20- and 80-year-old individuals.

56 FreeSurfer along with another surface analysis program, BrainVISA (Kochunov et al.,  
57 2012; Mangin, Rivière, et al., 2004; Mangin, Riviere, et al., 2004; Rivière et al., 2002), to  
58 characterize cortical thickness along with sulcal morphology (e.g, Cai et al., 2017;  
59 Lamont et al., 2014; Liu et al., 2011, 2013; Pizzagalli et al., 2017). While this combination  
60 allows for the estimation of sulcal morphology in addition to standard measures such  
61 as cortical thickness, FreeSurfer and BrainVISA rely on different anatomical landmarks  
62 (Mikhael et al., 2018) which can yield differences in their resulting cortical surface  
63 reconstructions (Lee et al., 2006). Admittedly, determining the boundaries for  
64 individual sulci and incorporating individual cortical variability is difficult (John et al.,  
65 2006; Mikhael et al., 2018; Ono et al., 1990; Welker, 1990). While an ennumerate amount  
66 of other methods have already been proposed to identify and characterize sulcal  
67 morphology (e.g., Andreasen et al., 1994; Auzias et al., 2015; Beeston & Taylor, 2000;  
68 Behnke et al., 2003; Eskildsen et al., 2005; Im et al., 2010; Jones et al., 2000; Le Goualher

69 et al., 1996, 1998; Li et al., 2008; Lohmann & von Cramon, 2000; Lohmann et al., 2008;  
70 Nowinski et al., 1996; Oguz et al., 2008; Perrot et al., 2011; Royackkers et al., 1999;  
71 Thompson et al., 1996; Vaillant & Davatzikos, 1997; Yun et al., 2013), ultimately these  
72 all are again using different landmarks than FreeSurfer uses for cortical parcellations  
73 (i.e., volume, thickness, surface area, gyrification). Note that, though FreeSurfer itself  
74 does compute sulcal maps, these are computed as normalized depths, not in real-world  
75 units (e.g. Kippenhan et al., 2005), furthermore, these are also independent of sulcal  
76 width information.

77 Here I describe a procedure for estimating sulcal morphology and report  
78 age-related differences in sulcal width and depth using three large samples of adults  
79 across the lifespan: two of these datasets are from Western samples, Dallas Lifespan  
80 Brain Study (DLBS) and Open Access Series of Imaging Studies (OASIS), as well as  
81 well as one East Asian sample, Southwest University Adult Lifespan (SALD), as  
82 potential differences between populations have been relatively understudied (Leong et  
83 al., 2017; Madan, 2017). To further validate the method, test-retest reliability was also  
84 assessed using a sample of young adults who were scanned ten times within the span  
85 of a month (Chen et al., 2015; Madan & Kensinger, 2017b). All four of these datasets are  
86 open-access and have sufficient sample sizes to be suitable for brain morphology  
87 research (Madan, 2017). This procedure has been implemented as a MATLAB toolbox  
88 that serves as an extension to FreeSurfer, `calcSulc`, that calculates sulcal  
89 morphology—both width and depth—using files generated as part of the standard  
90 FreeSurfer cortical reconstruction and parcellation pipeline. This toolbox is now made  
91 freely available as supplemental to this paper:  
92 <https://cmadan.github.io/calcSulc/>.

## 93 **2 Estimating sulcal morphology**

94 In this section I will outline the procedure and functionality of the `calcSulc` toolbox  
95 that was designed to automate characterization of individual sulci, based on  
96 intermediate files generated as part of the standard FreeSurfer analysis pipeline.

97 For each individual sulci (for each hemisphere and participant), the following  
98 approach was used to characterize the sulcal morphology. First the pial surface and  
99 Destrieux et al. (2010) parcellation labels were read into MATLAB by using the  
100 FreeSurfer-MATLAB toolbox provided alongside FreeSurfer (`calcSulc_load`).  
101 Using this, the faces associated with the individual sulci were isolated as a 3D mesh  
102 (`calcSulc_isolate`).

103 The width of each sulci (`calcSulc_width`) was calculated by determining  
104 which vertices lay on the boundary of the sulci and another region. An iterative  
105 procedure was then used to determine the 'chain' of edges that would form a  
106 contiguous edge-loop that encircle the sulci region (`calcSulc_getEdgeLoop`). This  
107 provided an exhaustive list of all vertices that were mid-way between the peak of the  
108 respective adjacent gyri and depth of the sulci itself. For each vertex in this edge-loop,  
109 the nearest point in 3D space that was *not* neighbouring in the loop was determined,  
110 with the goal of finding the nearest vertex in the edge that was on the opposite side of  
111 the sulci—i.e., a line between these two vertices would 'bridge' across the sulcus. Since  
112 these nearest vertices in the edge loop are not necessarily the nearest vertex along the  
113 opposite sulcus wall, an exhaustive search (walk) was performed, moving up to a 4  
114 edges from the initially determined nearest vertex (defined by  
115 `options.setWidthWalk`). The sulci width was then taken as the median of these  
116 distances that bridged across the sulci.

117 The depth of each sulci (`calcSulc_depth`) additionally used the FreeSurfer  
118 sulcal maps (`?h.sulc`) to determine the relative inflections in the surface mesh, which  
119 would be in alignment with the gyral crown. The deepest points of the sulcus, i.e., the  
120 sulcal fundus, were taken as the 100 vertices within the sulcus with the lowest values  
121 in the sulcal map. For these 100 vertices, the shortest distance to the smoothed  
122 gyrification surface was calculated, and the median of these was then taken as the  
123 sulcal depth.

124 Sulcal morphology, with and depth, was estimated for eight major sulci in each  
125 hemisphere: central, post-central, superior frontal, inferior frontal, parieto-occipital,

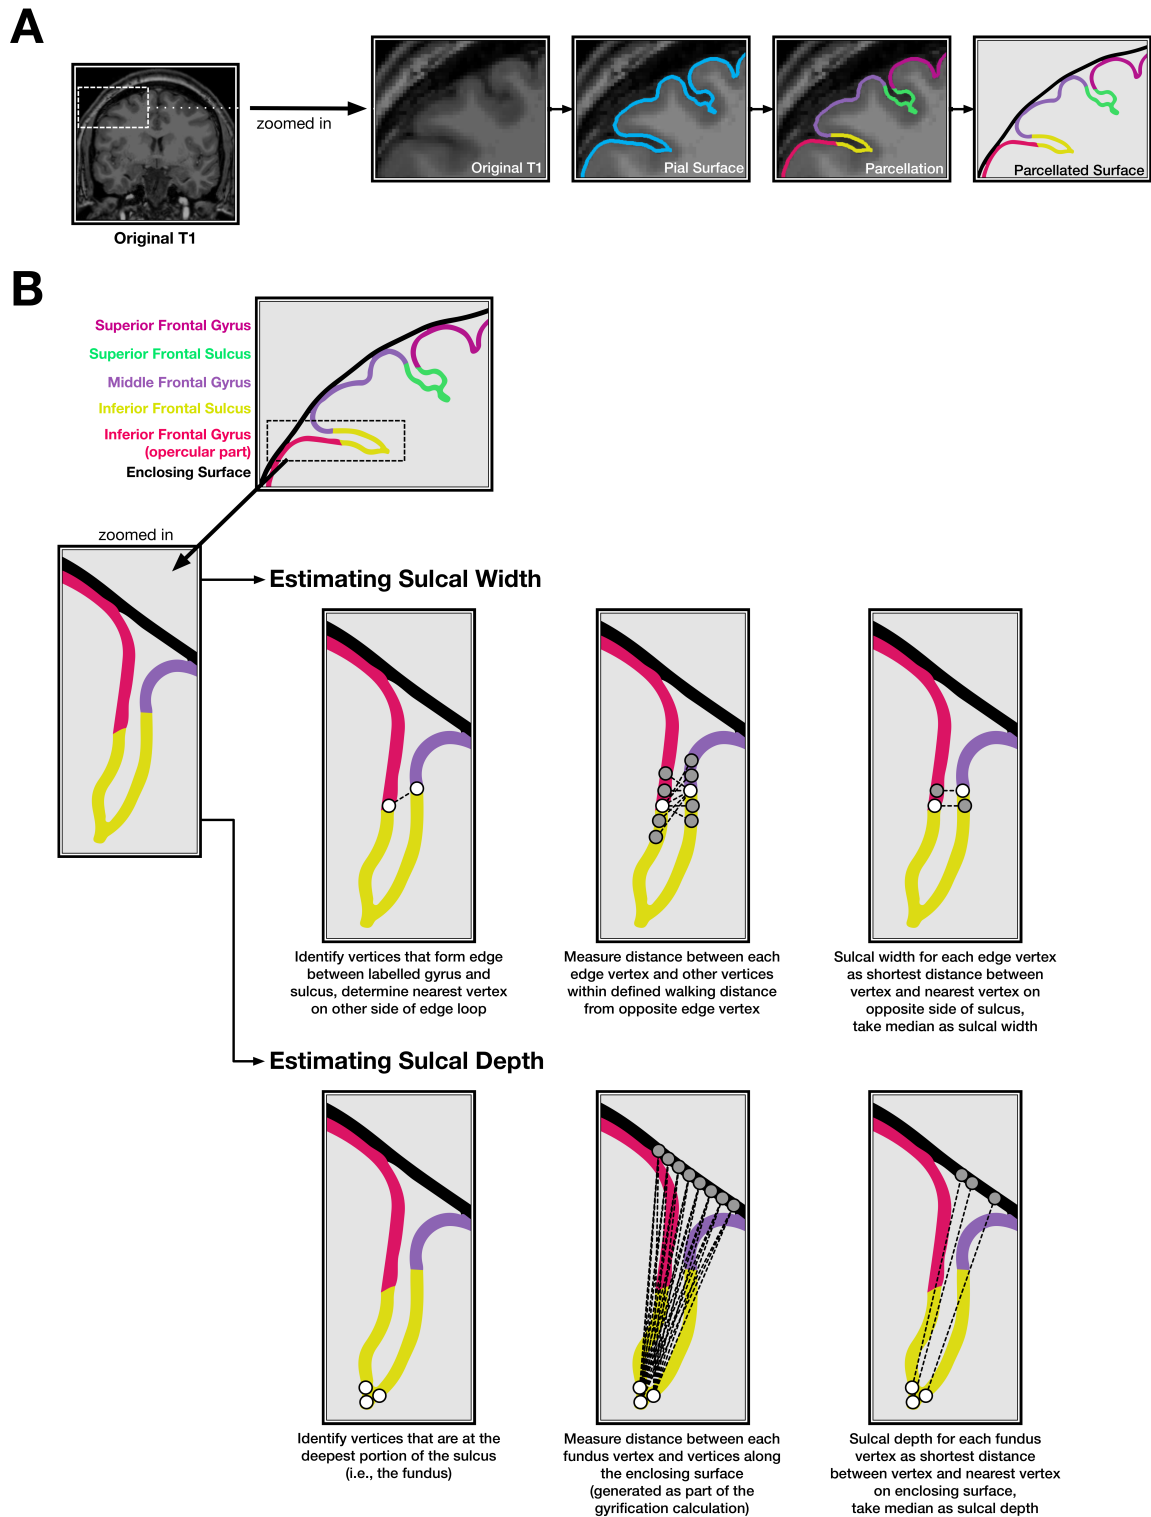

Figure 2. Illustration of the sulcal morphology method. (A) Cortical surface estimation and sulcal identification, as output from FreeSurfer. (B) Sulcal width and depth estimation procedure. Note that the surface mesh and estimation algorithm use many more vertices than shown here.

126 occipito-temporal, middle occipital and lunate, and marginal part of the cingulate (see  
127 Figure 3). Sulcal boundaries were defined based on the Destrieux et al. (2010)  
128 parcellation atlas (`S_central`, `S_postcentral`, `S_front_sup`, `S_front_inf`,  
129 `S_parieto_occipital`, `S_oc-temp_med&Lingual`, `S_oc_middle&Lunatus`,  
130 `S_cingul-Marginalis`).

### 131 3 Demonstration

#### 132 3.1 Methods

##### 133 3.1.1 Datasets

134 **3.1.1.1 OASIS.** This dataset consisted of 314 healthy adults (196 females), aged  
135 18–94, from the Open Access Series of Imaging Studies (OASIS) cross-sectional dataset  
136 (<http://www.oasis-brains.org>) (Marcus et al., 2007). Participants were  
137 recruited from a database of individuals who had (a) previously participated in MRI  
138 studies at Washington University, (b) were part of the Washington University  
139 Community, or (c) were from the longitudinal pool of the Washington University  
140 Alzheimer Disease Research Center. Participants were screened for neurological and  
141 psychiatric issues; the Mini-Mental State Examination (MMSE) and Clinical Dementia  
142 Rating (CDR) were administered to participants aged 60 and older. To only include

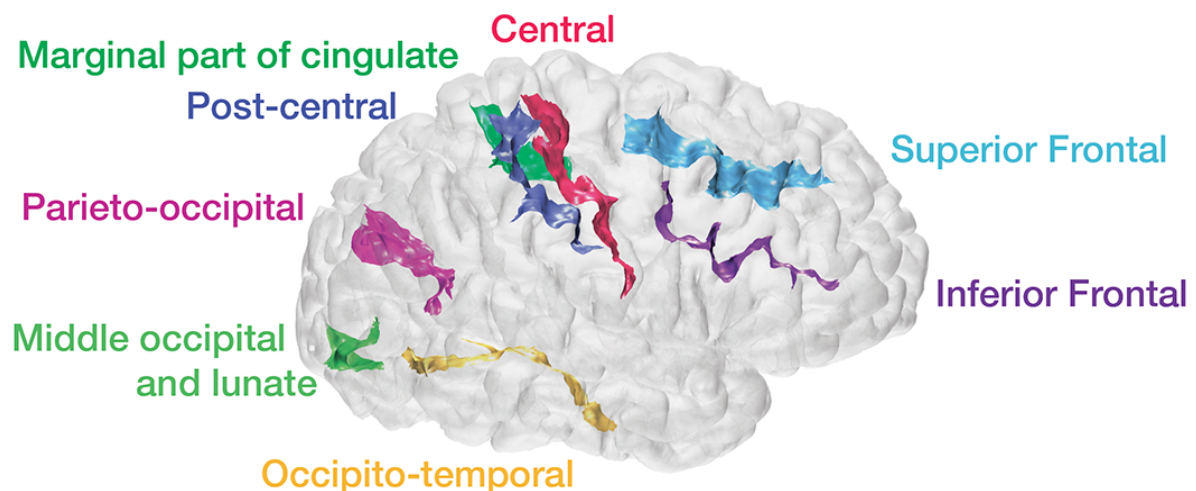

Figure 3. Example cortical surface with estimated sulci identified and labelled.



143 healthy adults, participants with a CDR above zero were excluded; all remaining  
144 participants scored 25 or above on the MMSE. Multiple T1 volumes were acquired  
145 using a Siemens Vision 1.5 T with a MPRAGE sequence; only the first volume was used  
146 here. Scan parameters were: TR=9.7 ms; TE=4.0 ms; flip angle=10°;  
147 voxel size=1.25×1×1 mm. Age-related comparisons for volumetric and fractal  
148 dimensionality measures from the OASIS dataset were previously reported in Madan  
149 and Kensinger (2017a), Madan and Kensinger (2018), and Madan (2018b) <sup>1</sup>.

150 **3.1.1.2 DLBS.** This dataset consisted of 315 healthy adults (198 females), aged  
151 20–89, from wave 1 of the Dallas Lifespan Brain Study (DLBS), made available through  
152 the International Neuroimaging Data-sharing Initiative (INDI) (Mennes et al., 2013)  
153 and hosted on the Neuroimaging Informatics Tools and Resources Clearinghouse  
154 (NITRC) (Kennedy et al., 2016)  
155 ([http://fcon\\_1000.projects.nitrc.org/indi/retro/dlbs.html](http://fcon_1000.projects.nitrc.org/indi/retro/dlbs.html)).  
156 Participants were screened for neurological and psychiatric issues. No participants in  
157 this dataset were excluded *a priori*. All participants scored 26 or above on the MMSE.  
158 T1 volumes were acquired using a Philips Achieva 3 T with a MPRAGE sequence. Scan  
159 parameters were: TR=8.1 ms; TE=3.7 ms; flip angle=12°; voxel size=1×1×1 mm. See  
160 Kennedy et al. (2015) and Chan et al. (2014) for further details about the dataset.  
161 Age-related comparisons for volumetric and fractal dimensionality measures from the  
162 DLBS dataset were previously reported in Madan and Kensinger (2017a), Madan and  
163 Kensinger (2018), and Madan (2018b) <sup>1</sup>.

164 **3.1.1.3 SALD.** This dataset consisted of 483 healthy adults (303 females), aged  
165 19–80, from the Southwest University Adult Lifespan Dataset (SALD) (Wei et al., 2018),  
166 also made available through INDI and hosted on NITRC  
167 ([http://fcon\\_1000.projects.nitrc.org/indi/retro/sald.html](http://fcon_1000.projects.nitrc.org/indi/retro/sald.html)). No  
168 participants in this dataset were excluded *a priori*. T1 volumes were acquired using a

---

<sup>1</sup>Note that analyses reported in these previous papers were based on preprocessing in FreeSurfer 5.3.0, rather than FreeSurfer 6.0.

169 Siemens Trio 3 T with a MPRAGE sequence. Scan parameters were: TR=1.9 s;  
170 TE=2.52 ms; flip angle=9°; voxel size=1×1×1 mm.

171 **3.1.1.4 CCBD.** This dataset consisted of 30 healthy adults (15 females), aged 20–30,  
172 from the Center for Cognition and Brain Disorders (CCBD) at Hangzhou Normal  
173 University (Chen et al., 2015). Each participant was scanned for 10 sessions, occurring  
174 2-3 days apart over a one-month period. No participants in this dataset were excluded  
175 *a priori*. T1 volumes were acquired using a SCANNER with a FSPGR sequence. Scan  
176 parameters were: TR=8.06 ms; TE=3.1 ms; flip angle=8°; voxel size: 1×1×1 mm. This  
177 dataset is included as part of the Consortium for Reliability and Reproducibility  
178 (CoRR) (Zuo et al., 2014) as HNU1. Test-retest comparisons for volumetric and fractal  
179 dimensionality measures from the CCBD dataset were previously reported in Madan  
180 and Kensinger (2017b)<sup>1</sup>.

### 181 **3.1.2 Procedure**

182 **3.1.2.1 Preprocessing of MRI data** Data were analyzed using FreeSurfer 6.0  
183 (<https://surfer.nmr.mgh.harvard.edu>) on a machine running Red Hat  
184 Enterprise Linux (RHEL) 7.4. FreeSurfer was used to automatically volumetrically  
185 segment and parcellate cortical and subcortical structures from the T1-weighted  
186 images (Fischl, 2012; Fischl & Dale, 2000) FreeSurfer's standard pipeline was used (i.e.,  
187 `recon-all`). No manual edits were made to the surface meshes, but surfaces were  
188 visually inspected. Cortical thickness is calculated as the distance between the white  
189 matter surface (white-gray interface) and pial surface (gray-CSF interface) .  
190 Gyrfication was also calculated using FreeSurfer, as described in Schaer et al. (2012).  
191 Cortical regions were parcellated based on the Destrieux et al. (2010) atlas, also part of  
192 the standard FreeSurfer analysis pipeline.

193 **3.1.2.2 Estimating sulcal morphology** Using the method proposed here, sulcal  
194 width and depth were estimated for eight major sulci in each hemisphere: central,  
195 post-central, superior frontal, inferior frontal, parieto-occipital, occipito-temporal,

196 middle occipital and lunate, and marginal part of the cingulate (see Figure 3). Sulcal  
197 boundaries were defined based on the Destrieux et al. (2010) parcellation atlas  
198 (`S_central`, `S_postcentral`, `S_front_sup`, `S_front_inf`,  
199 `S_parieto_occipital`, `S_oc-temp_med&Lingual`, `S_oc_middle&Lunatus`,  
200 `S_cingul-Marginalis`).

201 Preliminary analyses additionally included superior and inferior temporal sulci  
202 and intraparietal sulcus but these were removed from further analysis when the sulci  
203 width estimation was found to fail to determine a closed boundary edge-loop at an  
204 unacceptable rate ( $> 10\%$ ) for at least one hemisphere. This edge boundary  
205 determination failed when parcellated regions were labeled by FreeSurfer to comprise  
206 at least two discontinuous regions, such that they could not be identified using a single  
207 edge loop. Nonetheless, sulcal measures failed to be estimated for some participants,  
208 resulting in final samples of 310 adults from the OASIS dataset, 312 adults from the  
209 DLBS dataset, 481 adults from the SALD dataset, and 30 adults from the CCBD dataset.

210 **3.1.2.3 Test-retest reliability** Test-retest reliability was assessed as intraclass  
211 correlation coefficient (*ICC*), which can be used to quantify the relationship between  
212 multiple measurements (Asendorpf & Wallbott, 1979; Bartko, 1966; Chen et al., 2018;  
213 Hallgren, 2012; Koo & Li, 2016; Madan & Kensinger, 2017b; Rajaratnam, 1960; Shrout &  
214 Fleiss, 1979). McGraw and Wong (1996) provide a comprehensive review of the various  
215 *ICC* formulas and their applicability to different research questions. *ICC* was  
216 calculated as the one-way random effects model for the consistency of single  
217 measurements, i.e., *ICC*(1, 1). As a general guideline, *ICC* values between .75 and  
218 1.00 are considered 'excellent,' .60–.74 is 'good,' .40–.59 is 'fair,' and below .40 is 'poor'  
219 (Cicchetti, 1994).

## 220 3.2 Results & Discussion

221 **3.2.0.1 Age-related differences in sulcal morphology** Scatter plots showing the  
222 relationships between each individual sulci width and depth and age, for the OASIS

223 dataset, are shown in Figure 4; the corresponding correlations for all datasets are  
224 shown in Tables 1 and 2. The width and depth of the central and post-central sulci  
225 appear to be particularly correlated with age, with wider and shallower sulci in older  
226 adults. Age-related differences in sulcal width and depth are generally present in  
227 other sulci as well, but are generally weaker.

228 Age-related relationships for each sulci were relatively consistent between the  
229 two Western lifespan datasets (OASIS and DLBS), but age-related differences in sulcal  
230 width (but not depth) were markedly weaker in the East Asian lifespan dataset (SALD).  
231 This finding will need to be studied further, but may be related to gross differences in  
232 anatomical structure (Kochunov et al., 2003; Tang et al., 2010). Importantly, test-retest  
233 reliability,  $ICC(1, 1)$ , was particularly good for the sulcal depth across individual sulci.

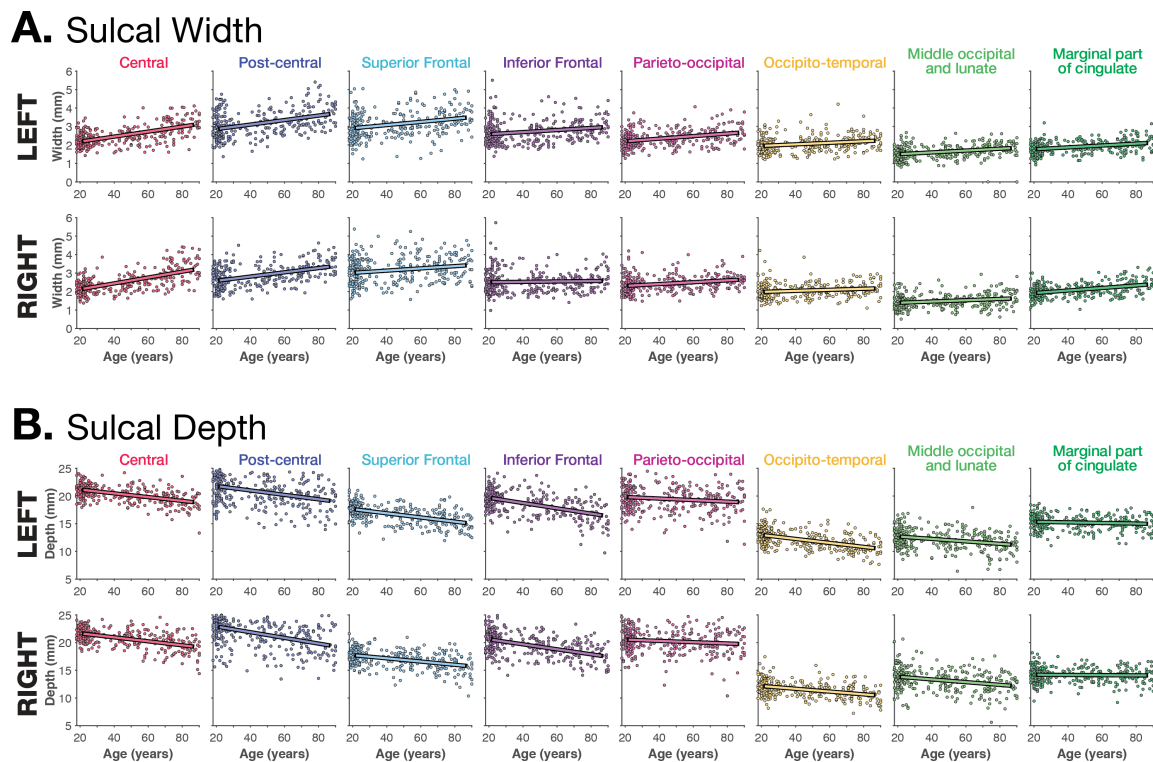

Figure 4. Relationship between (A) sulcal depth and (B) width for each of the sulci examined, based on the OASIS dataset.

234 To obtain a coarse summary measure across sulci, I averaged the sulcal width  
235 across the 16 individual sulci for each individual, and with each dataset, and examined  
236 the relationship between mean sulcal width with age. These correlations, shown in

## SULCAL MORPHOLOGY

| Sulci Name                  | FreeSurfer Label†     | Hemi. | OASIS          | DLBS           | SALD           | CCBD             |                      |
|-----------------------------|-----------------------|-------|----------------|----------------|----------------|------------------|----------------------|
|                             |                       |       | <i>r</i> (Age) | <i>r</i> (Age) | <i>r</i> (Age) | <i>ICC</i> (1,1) | 95% CI of <i>ICC</i> |
| Central                     | S_central             | L     | .586           | .486           | .322           | .858             | [ 0.785, 0.918]      |
|                             |                       | R     | .632           | .523           | .294           | .842             | [ 0.764, 0.908]      |
| Post-central                | S_postcentral         | L     | .413           | .391           | .198           | .764             | [ 0.660, 0.858]      |
|                             |                       | R     | .460           | .436           | .213           | .864             | [ 0.794, 0.922]      |
| Superior Frontal            | S_front_sup           | L     | .281           | .421           | .055           | .797             | [ 0.703, 0.880]      |
|                             |                       | R     | .205           | .291           | .035           | .843             | [ 0.764, 0.909]      |
| Inferior Frontal            | S_front_inf           | L     | .217           | .323           | -.037          | .775             | [ 0.675, 0.865]      |
|                             |                       | R     | .043           | .222           | -.036          | .831             | [ 0.748, 0.901]      |
| Parieto-occipital           | S_parieto_occipital   | L     | .348           | .279           | .145           | .616             | [ 0.486, 0.753]      |
| Occipito-temporal           | S_oc-temp_med&Lingual | R     | .257           | .357           | .213           | .682             | [ 0.561, 0.802]      |
|                             |                       | L     | .227           | .270           | -.055          | .660             | [ 0.535, 0.786]      |
| Middle occipital and lunate | S_oc_middle&Lunatus   | R     | .168           | .189           | .017           | .692             | [ 0.572, 0.808]      |
|                             |                       | L     | .306           | .271           | .145           | .605             | [ 0.474, 0.744]      |
| Marginal part of cingulate  | S_cingul-Marginalis   | R     | .212           | .177           | .023           | .625             | [ 0.496, 0.760]      |
|                             |                       | L     | .340           | .275           | .075           | .783             | [ 0.685, 0.871]      |
|                             |                       | R     | .430           | .382           | .161           | .757             | [ 0.651, 0.853]      |
| <i>Mean</i>                 |                       |       | .636           | .592           | .227           | .907             | [ 0.856, 0.947]      |

Table 1

*Correlations between sulcal width and age for each sulci and hemisphere, for each of the three lifespan datasets examined. Test-retest reliability, ICC(1, 1), is also included from the CCBD dataset. †FreeSurfer labels in version 6.0; labels are named slightly different in version 5.3.*

| Sulci Name                  | FreeSurfer Label†     | Hemi. | OASIS          | DLBS           | SALD           | CCBD             |                      |
|-----------------------------|-----------------------|-------|----------------|----------------|----------------|------------------|----------------------|
|                             |                       |       | <i>r</i> (Age) | <i>r</i> (Age) | <i>r</i> (Age) | <i>ICC</i> (1,1) | 95% CI of <i>ICC</i> |
| Central                     | S_central             | L     | -.517          | -.205          | -.346          | .848             | [ 0.772, 0.912]      |
|                             |                       | R     | -.505          | -.256          | -.348          | .860             | [ 0.789, 0.919]      |
| Post-central                | S_postcentral         | L     | -.371          | -.264          | -.268          | .965             | [ 0.944, 0.981]      |
|                             |                       | R     | -.436          | -.246          | -.330          | .890             | [ 0.831, 0.937]      |
| Superior Frontal            | S_front_sup           | L     | -.523          | -.454          | -.397          | .899             | [ 0.844, 0.943]      |
|                             |                       | R     | -.413          | -.465          | -.444          | .886             | [ 0.825, 0.935]      |
| Inferior Frontal            | S_front_inf           | L     | -.517          | -.490          | -.491          | .932             | [ 0.893, 0.962]      |
|                             |                       | R     | -.496          | -.480          | -.490          | .915             | [ 0.868, 0.952]      |
| Parieto-occipital           | S_parieto_occipital   | L     | -.145          | -.093          | -.241          | .979             | [ 0.966, 0.989]      |
| Occipito-temporal           | S_oc-temp_med&Lingual | R     | -.124          | .059           | -.229          | .970             | [ 0.952, 0.984]      |
|                             |                       | L     | -.509          | -.323          | -.263          | .953             | [ 0.926, 0.974]      |
| Middle occipital and lunate | S_oc_middle&Lunatus   | R     | -.404          | -.316          | -.281          | .913             | [ 0.864, 0.951]      |
|                             |                       | L     | -.290          | -.167          | -.150          | .949             | [ 0.919, 0.972]      |
| Marginal part of cingulate  | S_cingul-Marginalis   | R     | -.288          | -.120          | -.132          | .922             | [ 0.879, 0.956]      |
|                             |                       | L     | -.092          | -.035          | -.268          | .952             | [ 0.925, 0.974]      |
|                             |                       | R     | -.032          | -.017          | -.156          | .918             | [ 0.872, 0.954]      |
| <i>Mean</i>                 |                       |       | -.465          | -.645          | -.600          | .972             | [ 0.955, 0.985]      |

Table 2

*Correlations between sulcal depth and age for each sulci and hemisphere, for each of the three lifespan datasets examined. Test-retest reliability, ICC(1, 1), is also included from the CCBD dataset. †FreeSurfer labels in version 6.0; labels are named slightly different in version 5.3.*

237 Table 1, indicate that the mean sulcal width was generally a better indicator of  
238 age-related differences in sulcal morphology than individual sulci, and had increased  
239 test-retest reliability. Mean sulcal depth was similarly more sensitive to age-related  
240 differences than individual sulci (e.g., it is unclear why the relationship between age  
241 and width of the central sulcus differed between samples) and the magnitude of this  
242 relationship was more consistent across datasets. Reliability was even higher for mean  
243 sulcal depth than mean sulcal width.

244 **3.2.0.2 Comparison with other age-related structural differences** Within each  
245 dataset, mean sulcal depth and width correlated with age, as shown in Tables 1 and 2.  
246 Of course, other measures of brain morphology also differ with age, such as mean  
247 (global) cortical thickness [OASIS:  $r(308) = -.793, p < .001$ ; DLBS:  $r(310) = -.759,$   
248  $p < .001$ ; SALD:  $r(479) = -.642, p < .001$ ]. Additionally, volume of the third ventricle  
249 (ICV-corrected) has been previously shown to significantly related to age (Madan &  
250 Kensinger, 2017a; Walhovd et al., 2011), and was found to be true in each of the  
251 examined lifespan datasets here as well [OASIS:  $r(308) = .665, p < .001$ ; DLBS:  
252  $r(310) = .677, p < .001$ ; SALD:  $r(479) = .328, p < .001$ ].

253 To test if these mean sulcal measures served as distinct measures of age-related  
254 differences in brain morphology, beyond those provided by other measures, such as  
255 mean cortical thickness and volume of the third ventricle, I conducted partial  
256 correlations that controlled for these two other measures of age-related atrophy. Mean  
257 sulcal width [OASIS:  $r_p(306) = .188, p < .001$ ; DLBS:  $r_p(308) = .177, p = .002$ ; SALD:  
258  $r(477) = .003, p = .96$ ] and depth [OASIS:  $r_p(306) = -.443, p < .001$ ; DLBS:  
259  $r_p(308) = -.397, p < .001$ ; SALD:  $r_p(477) = -.534, p < .001$ ] both explained unique  
260 variance in relation to age. Thus, even though more established measures of  
261 age-related differences in brain morphology were replicated here, the additional sulcal  
262 measures captured aspects of aging that are not accounted for by these extant  
263 measures, indicating that these sulcal measures are worth pursuing further and are not  
264 redundant with other measures of brain structure. Providing additional support for

265 this, mean sulcal width and depth were only weakly related to each other [OASIS:  
266  $r(308) = -.192, p < .001$ ; DLBS:  $r(310) = .092, p = .104$ ; SALD:  $r(479) = .119, p = .009$ ].

267 As with the individual sulci measures, I did observe a difference between  
268 samples where some age-related measures were less sensitive in the East Asian lifespan  
269 sample (SALD), here in the ventricle volume correlation and the unsurprisingly  
270 weaker age relationship in the partial correlation using sulcal width. These sample  
271 differences are puzzling, though there is a general correspondence between the two  
272 Western samples. Given that much of the literature is also based on Western samples, I  
273 think further research with East Asian samples, and particularly comparing samples  
274 with the same analysis pipeline, is necessary to shed further light on this initial finding.

## 275 **4 Conclusion**

276 Differences in sulcal width and depth are quite visually prominent, but are not often  
277 quantified when examining individual differences in cortical structure. Here I  
278 examined age-related differences in both sulcal measures as a proof-of-principle to  
279 demonstrate the utility of the calcSulc toolbox that accompanies this paper and is  
280 designed to closely compliment the standard FreeSurfer pipeline. This allows for the  
281 additional measurement of sulcal morphology, to add to the extant measures of brain  
282 morphology such as cortical thickness, area, and gyrification. Critically, this approach  
283 uses the same landmarks and boundaries as in the Destrieux et al. (2010) parcellation  
284 atlas, in contrast to all previous approaches to characterize sulcal features. This toolbox  
285 is now made freely available as supplemental to this paper:

286 <https://cmadan.github.io/calcSulc/>.

287 Using this approach, here I demonstrate age-related differences in sulcal width  
288 and depth, as well as high test-retest reliability. Since individual differences in sulcal  
289 morphology are sufficiently distinct from those characterized by other brain  
290 morphology measures, this approach should complement extant work of investigating  
291 factors that influence brain morphology, e.g., see Figure 3 of Madan and Kensinger  
292 (2018). Given the flexibility in the methodological approach, these measures can be

293 readily applied to other samples after being initially processed with FreeSurfer.

## 294 **Acknowledgments**

295 MRI data used in the preparation of this article were obtained from several sources,  
296 data were provided in part by: (1) the Open Access Series of Imaging Studies (OASIS)  
297 (Marcus et al., 2007); (2) wave 1 of the Dallas Lifespan Brain Study (DLBS) led by Dr.  
298 Denise Park and distributed through INDI (Mennes et al., 2013) and NITRC (Kennedy  
299 et al., 2016); (3) the Southwest University Adult Lifespan Dataset (SALD) (Wei et al.,  
300 2018), also made available through INDI and hosted on NITRC; and (4) the Center for  
301 Cognition and Brain Disorders (CCBD) (Chen et al., 2015) as dataset HNU1 in the  
302 Consortium for Reliability and Reproducibility (CoRR) (Zuo et al., 2014).



References

303

304 Andersen, S. K., Jakobsen, C. E., Pedersen, C. H., Rasmussen, A. M., Plochanski, M., &  
305 Østergaard, L. R. (2015). Classification of Alzheimer's disease from MRI using  
306 sulcal morphology. In *Image analysis* (pp. 103–113). Springer International  
307 Publishing. doi: 10.1007/978-3-319-19665-7\_9

308 Andreasen, N. C., Harris, G., Cizadlo, T., Arndt, S., O'Leary, D. S., Swayze, V., & Flaum,  
309 M. (1994). Techniques for measuring sulcal/gyral patterns in the brain as  
310 visualized through magnetic resonance scanning: BRAINPLOT and BRAINMAP.  
311 *Proceedings of the National Academy of Sciences*, 91, 93–97. doi: 10.1073/pnas.91.1.93

312

313 Asendorpf, J., & Wallbott, H. G. (1979). Maße der Beobachterübereinstimmung: ein  
314 systematischer Vergleich. *Zeitschrift für Sozialpsychologie*, 10, 243–252.

315 Auzias, G., Brun, L., Deruelle, C., & Coulon, O. (2015). Deep sulcal landmarks:  
316 Algorithmic and conceptual improvements in the definition and extraction of  
317 sulcal pits. *NeuroImage*, 111, 12–25. doi: 10.1016/j.neuroimage.2015.02.008

318 Bartko, J. J. (1966). The intraclass correlation coefficient as a measure of reliability.  
319 *Psychological Reports*, 19, 3–11. doi: 10.2466/pr0.1966.19.1.3

320 Beeston, C. J., & Taylor, C. J. (2000). Automatic landmarking of cortical sulci. In *Medical*  
321 *image computing and computer-assisted intervention—MICCAI 2000* (pp. 125–133).  
322 Springer Berlin Heidelberg. doi: 10.1007/978-3-540-40899-4\_13

323 Behnke, K. J., Rettmann, M. E., Pham, D. L., Shen, D., Resnick, S. M., Davatzikos, C., &  
324 Prince, J. L. (2003). Automatic classification of sulcal regions of the human brain  
325 cortex using pattern recognition. In M. Sonka & J. M. Fitzpatrick (Eds.), *Medical*  
326 *imaging 2003: Image processing*. SPIE. doi: 10.1117/12.480834

327 Cai, K., Xu, H., Guan, H., Zhu, W., Jiang, J., Cui, Y., ... Wen, W. (2017). Identification of  
328 early-stage Alzheimer's disease using sulcal morphology and other common  
329 neuroimaging indices. *PLOS ONE*, 12, e0170875. doi:  
330 10.1371/journal.pone.0170875

331 Cao, B., Mwangi, B., Passos, I. C., Wu, M.-J., Keser, Z., Zunta-Soares, G. B., ... Soares,

- 332 J. C. (2017). Lifespan gyrification trajectories of human brain in healthy  
333 individuals and patients with major psychiatric disorders. *Scientific Reports*, 7,  
334 511. doi: 10.1038/s41598-017-00582-1
- 335 Chan, M. Y., Park, D. C., Savalia, N. K., Petersen, S. E., & Wig, G. S. (2014). Decreased  
336 segregation of brain systems across the healthy adult lifespan. *Proceedings of the*  
337 *National Academy of Sciences USA*, 111, E4997–E5006. doi:  
338 10.1073/pnas.1415122111
- 339 Chen, B., Xu, T., Zhou, C., Wang, L., Yang, N., Wang, Z., ... Weng, X.-C. (2015).  
340 Individual variability and test-retest reliability revealed by ten repeated  
341 resting-state brain scans over one month. *PLOS ONE*, 10, e0144963. doi:  
342 10.1371/journal.pone.0144963
- 343 Chen, G., Taylor, P. A., Haller, S. P., Kircanski, K., Stoddard, J., Pine, D. S., ... Cox, R. W.  
344 (2018). Intraclass correlation: Improved modeling approaches and applications  
345 for neuroimaging. *Human Brain Mapping*, 39, 1187–1206. doi: 10.1002/hbm.23909  
346
- 347 Cicchetti, D. V. (1994). Guidelines, criteria, and rules of thumb for evaluating normed  
348 and standardized assessment instruments in psychology. *Psychological Assessment*,  
349 6, 284–290. doi: 10.1037/1040-3590.6.4.284
- 350 Coffey, C. E., Wilkinson, W. E., Parashos, L., Soady, S., Sullivan, R. J., Patterson, L. J., ...  
351 Djang, W. T. (1992). Quantitative cerebral anatomy of the aging human brain: A  
352 cross-sectional study using magnetic resonance imaging. *Neurology*, 42, 527–527.  
353 doi: 10.1212/wnl.42.3.527
- 354 Destrieux, C., Fischl, B., Dale, A., & Halgren, E. (2010). Automatic parcellation of  
355 human cortical gyri and sulci using standard anatomical nomenclature.  
356 *NeuroImage*, 53, 1–15. doi: 10.1016/j.neuroimage.2010.06.010
- 357 Drayer, B. P. (1988). Imaging of the aging brain. Part I. normal findings. *Radiology*, 166,  
358 785–796. doi: 10.1148/radiology.166.3.3277247
- 359 Elkis, H., Friedman, L., Wise, A., & Meltzer, H. Y. (1995). Meta-analyses of studies of  
360 ventricular enlargement and cortical sulcal prominence in mood disorders.

- 361 *Archives of General Psychiatry*, 52, 735. doi: 10.1001/archpsyc.1995.03950210029008
- 362
- 363 Eskildsen, S. F., Uldahl, M., & Ostergaard, L. R. (2005). Extraction of the cerebral  
364 cortical boundaries from MRI for measurement of cortical thickness. In  
365 J. M. Fitzpatrick & J. M. Reinhardt (Eds.), *Medical imaging 2005: Image processing*.  
366 SPIE. doi: 10.1117/12.595145
- 367 Fischl, B. (2012). FreeSurfer. *NeuroImage*, 62, 774–781. doi:  
368 10.1016/j.neuroimage.2012.01.021
- 369 Fischl, B., & Dale, A. M. (2000). Measuring the thickness of the human cerebral cortex  
370 from magnetic resonance images. *Proceedings of the National Academy of Sciences*  
371 *USA*, 97, 11050–11055. doi: 10.1073/pnas.200033797
- 372 Fjell, A. M., Westlye, L. T., Amlie, I., Espeseth, T., Reinvang, I., Raz, N., ... Walhovd,  
373 K. B. (2009). High consistency of regional cortical thinning in aging across  
374 multiple samples. *Cerebral Cortex*, 19, 2001–2012. doi: 10.1093/cercor/bhn232
- 375 Hallgren, K. A. (2012). Computing inter-rater reliability for observational data: An  
376 overview and tutorial. *Tutorials in Quantitative Methods for Psychology*, 8, 23–34.  
377 doi: 10.20982/tqmp.08.1.p023
- 378 Hamelin, L., Bertoux, M., Bottlaender, M., Corne, H., Lagarde, J., Hahn, V., ... Sarazin,  
379 M. (2015). Sulcal morphology as a new imaging marker for the diagnosis of early  
380 onset Alzheimer's disease. *Neurobiology of Aging*, 36, 2932–2939. doi:  
381 10.1016/j.neurobiolaging.2015.04.019
- 382 Hogstrom, L. J., Westlye, L. T., Walhovd, K. B., & Fjell, A. M. (2013). The structure of the  
383 cerebral cortex across adult life: Age-related patterns of surface area, thickness,  
384 and gyrification. *Cerebral Cortex*, 23, 2521–2530. doi: 10.1093/cercor/bhs231
- 385 Huckman, M. S., Fox, J., & Topel, J. (1975). The validity of criteria for the evaluation of  
386 cerebral atrophy by computed tomography. *Radiology*, 116, 85–92. doi:  
387 10.1148/116.1.85
- 388 Hutton, C., Draganski, B., Ashburner, J., & Weiskopf, N. (2009). A comparison between  
389 voxel-based cortical thickness and voxel-based morphometry in normal aging.

- 390 *NeuroImage*, 48, 371–380. doi: 10.1016/j.neuroimage.2009.06.043
- 391 Im, K., Jo, H. J., Mangin, J.-F., Evans, A. C., Kim, S. I., & Lee, J.-M. (2010). Spatial  
392 distribution of deep sulcal landmarks and hemispherical asymmetry on the  
393 cortical surface. *Cerebral Cortex*, 20, 602–611. doi: 10.1093/cercor/bhp127
- 394 Jacoby, R. J., Levy, R., & Dawson, J. M. (1980). Computed tomography in the elderly: I.  
395 The normal population. *British Journal of Psychiatry*, 136, 249–255. doi:  
396 10.1192/bjp.136.3.249
- 397 John, J. P., Wang, L., Moffitt, A. J., Singh, H. K., Gado, M. H., & Csernansky, J. G. (2006).  
398 Inter-rater reliability of manual segmentation of the superior, inferior and middle  
399 frontal gyri. *Psychiatry Research: Neuroimaging*, 148, 151–163. doi:  
400 10.1016/j.psychresns.2006.05.006
- 401 Jones, S. E., Buchbinder, B. R., & Aharon, I. (2000). Three-dimensional mapping of  
402 cortical thickness using Laplace's equation. *Human Brain Mapping*, 11, 12–32. doi:  
403 10.1002/1097-0193(200009)11:1<12::aid-hbm20>3.0.co;2-k
- 404 Kennedy, D. N., Haselgrove, C., Riehl, J., Preuss, N., & Buccigrossi, R. (2016). The  
405 NITRC image repository. *NeuroImage*, 124, 1069–1073. doi:  
406 10.1016/j.neuroimage.2015.05.074
- 407 Kennedy, K. M., Rodrigue, K. M., Bischof, G. N., Hebrank, A. C., Reuter-Lorenz, P. A.,  
408 & Park, D. C. (2015). Age trajectories of functional activation under conditions of  
409 low and high processing demands: An adult lifespan fMRI study of the aging  
410 brain. *NeuroImage*, 104, 21–34. doi: 10.1016/j.neuroimage.2014.09.056
- 411 Kippenhan, J. S., Olsen, R. K., Mervis, C. B., Morris, C. A., Kohn, P., Meyer-Lindenberg,  
412 A., & Berman, K. F. (2005). Genetic contributions to human gyrification: Sulcal  
413 morphometry in Williams syndrome. *Journal of Neuroscience*, 25, 7840–7846. doi:  
414 10.1523/jneurosci.1722-05.2005
- 415 Kochunov, P., Fox, P., Lancaster, J., Tan, L. H., Amunts, K., Zilles, K., ... Gao, J. H.  
416 (2003). Localized morphological brain differences between english-speaking  
417 caucasians and chinese-speaking asians: new evidence of anatomical plasticity.  
418 *NeuroReport*, 14, 961–964. doi: 10.1097/01.wnr.0000075417.59944.00

- 419 Kochunov, P., Mangin, J.-F., Coyle, T., Lancaster, J., Thompson, P., Rivière, D., . . . Fox,  
420 P. T. (2005). Age-related morphology trends of cortical sulci. *Human Brain*  
421 *Mapping*, 26, 210–220. doi: 10.1002/hbm.20198
- 422 Kochunov, P., Rogers, W., Mangin, J.-F., & Lancaster, J. (2012). A library of cortical  
423 morphology analysis tools to study development, aging and genetics of cerebral  
424 cortex. *Neuroinformatics*, 10, 81–96. doi: 10.1007/s12021-011-9127-9
- 425 Kochunov, P., Thompson, P. M., Coyle, T. R., Lancaster, J. L., Kochunov, V., Royall, D.,  
426 . . . Fox, P. T. (2008). Relationship among neuroimaging indices of cerebral health  
427 during normal aging. *Human Brain Mapping*, 29, 36–45. doi: 10.1002/hbm.20369
- 428 Koo, T. K., & Li, M. Y. (2016). A guideline of selecting and reporting intraclass  
429 correlation coefficients for reliability research. *Journal of Chiropractic Medicine*, 15,  
430 155–163. doi: 10.1016/j.jcm.2016.02.012
- 431 Laffey, P. A., Peyster, R. G., Nathan, R., Haskin, M. E., & McGinley, J. A. (1984).  
432 Computed tomography and aging: Results in a normal elderly population.  
433 *Neuroradiology*, 26, 273–278. doi: 10.1007/BF00339770
- 434 Lamont, A. J., Mortby, M. E., Anstey, K. J., Sachdev, P. S., & Cherbuin, N. (2014). Using  
435 sulcal and gyral measures of brain structure to investigate benefits of an active  
436 lifestyle. *NeuroImage*, 91, 353–359. doi: 10.1016/j.neuroimage.2014.01.008
- 437 Largen, J. W., Smith, R. C., Calderon, M., Baumgartner, R., Lu, R. B., Schoolar, J. C., &  
438 Ravichandran, G. K. (1984). Abnormalities of brain structure and density in  
439 schizophrenia. *Biological Psychiatry*, 19, 991–1013.
- 440 Le Goualher, G., Barillot, C., Bizais, Y. J., & Scarabin, J.-M. (1996). Three-dimensional  
441 segmentation of cortical sulci using active models. In M. H. Loew &  
442 K. M. Hanson (Eds.), *Medical imaging 1996: Image processing*. SPIE. doi:  
443 10.1117/12.237928
- 444 Le Goualher, G., Collins, D. L., Barillot, C., & Evans, A. C. (1998). Automatic  
445 identificaion of cortical sulci using a 3d probabilistic atlas. In *Medical image*  
446 *computing and computer-assisted intervention – MICCAI’98* (pp. 509–518). Springer  
447 Berlin Heidelberg. doi: 10.1007/bfb0056236

- 448 Lee, J. K., Lee, J.-M., Kim, J. S., Kim, I. Y., Evans, A. C., & Kim, S. I. (2006). A novel  
449 quantitative cross-validation of different cortical surface reconstruction  
450 algorithms using MRI phantom. *NeuroImage*, *31*, 572–584. doi:  
451 10.1016/j.neuroimage.2005.12.044
- 452 Lemaitre, H., Goldman, A. L., Sambataro, F., Verchinski, B. A., Meyer-Lindenberg, A.,  
453 Weinberger, D. R., & Mattay, V. S. (2012). Normal age-related brain  
454 morphometric changes: nonuniformity across cortical thickness, surface area and  
455 gray matter volume? *Neurobiology of Aging*, *33*, 617.e1–617.e9. doi:  
456 10.1016/j.neurobiolaging.2010.07.013
- 457 Leong, R. L., Lo, J. C., Sim, S. K., Zheng, H., Tandi, J., Zhou, J., & Chee, M. W. (2017).  
458 Longitudinal brain structure and cognitive changes over 8 years in an east asian  
459 cohort. *NeuroImage*, *147*, 852–860. doi: 10.1016/j.neuroimage.2016.10.016
- 460 Li, G., Liu, T., Nie, J., Guo, L., & Wong, S. T. C. (2008). A novel method for cortical  
461 sulcal fundi extraction. In *Medical image computing and computer-assisted  
462 intervention–MICCAI 2008* (pp. 270–278). Springer Berlin Heidelberg. doi:  
463 10.1007/978-3-540-85988-8\_33
- 464 Liu, T., Lipnicki, D. M., Zhu, W., Tao, D., Zhang, C., Cui, Y., ... Wen, W. (2012). Cortical  
465 gyrification and sulcal spans in early stage Alzheimer's disease. *PLOS ONE*, *7*,  
466 e31083. doi: 10.1371/journal.pone.0031083
- 467 Liu, T., Sachdev, P. S., Lipnicki, D. M., Jiang, J., Geng, G., Zhu, W., ... Wen, W. (2013).  
468 Limited relationships between two-year changes in sulcal morphology and other  
469 common neuroimaging indices in the elderly. *NeuroImage*, *83*, 12–17. doi:  
470 10.1016/j.neuroimage.2013.06.058
- 471 Liu, T., Wen, W., Zhu, W., Kochan, N. A., Trollor, J. N., Reppermund, S., ... Sachdev,  
472 P. S. (2011). The relationship between cortical sulcal variability and cognitive  
473 performance in the elderly. *NeuroImage*, *56*, 865–873. doi:  
474 10.1016/j.neuroimage.2011.03.015
- 475 Liu, T., Wen, W., Zhu, W., Trollor, J., Reppermund, S., Crawford, J., ... Sachdev, P.  
476 (2010). The effects of age and sex on cortical sulci in the elderly. *NeuroImage*, *51*,

- 477 19–27. doi: 10.1016/j.neuroimage.2010.02.016
- 478 Lohmann, G., & von Cramon, D. Y. (2000). Automatic labelling of the human cortical  
479 surface using sulcal basins. *Medical Image Analysis*, 4, 179–188. doi:  
480 10.1016/s1361-8415(00)00024-4
- 481 Lohmann, G., von Cramon, D. Y., & Colchester, A. C. F. (2008). Deep sulcal landmarks  
482 provide an organizing framework for human cortical folding. *Cerebral Cortex*, 18,  
483 1415–1420. doi: 10.1093/cercor/bhm174
- 484 Madan, C. R. (2017). Advances in studying brain morphology: The benefits of  
485 open-access data. *Frontiers in Human Neuroscience*, 11, 405. doi:  
486 10.3389/fnhum.2017.00405
- 487 Madan, C. R. (2018a). Age differences in head motion and estimates of cortical  
488 morphology. *PeerJ*, 6, e5176.
- 489 Madan, C. R. (2018b). Shape-related characteristics of age-related differences in  
490 subcortical structures. *Aging & Mental Health*. doi:  
491 10.1080/13607863.2017.1421613
- 492 Madan, C. R., & Kensinger, E. A. (2016). Cortical complexity as a measure of  
493 age-related brain atrophy. *NeuroImage*, 134, 617–629. doi:  
494 10.1016/j.neuroimage.2016.04.029
- 495 Madan, C. R., & Kensinger, E. A. (2017a). Age-related differences in the structural  
496 complexity of subcortical and ventricular structures. *Neurobiology of Aging*, 50,  
497 87–95. doi: 10.1016/j.neurobiolaging.2016.10.023
- 498 Madan, C. R., & Kensinger, E. A. (2017b). Test–retest reliability of brain morphology  
499 estimates. *Brain Informatics*, 4, 107–121. doi: 10.1007/s40708-016-0060-4
- 500 Madan, C. R., & Kensinger, E. A. (2018). Predicting age from cortical structure across  
501 the lifespan. *European Journal of Neuroscience*, 47, 399–416. doi: 10.1111/ejn.13835
- 502 Mangin, J.-F., Riviere, D., Cachia, A., Duchesnay, E., Cointepas, Y.,  
503 Papadopoulos-Orfanos, D., ... Regis, J. (2004). Object-based morphometry of the  
504 cerebral cortex. *IEEE Transactions on Medical Imaging*, 23, 968–982. doi:  
505 10.1109/tmi.2004.831204

- 506 Mangin, J.-F., Rivière, D., Coulon, O., Poupon, C., Cachia, A., Cointepas, Y., ...  
507 Papadopoulos-Orfanos, D. (2004). Coordinate-based versus structural  
508 approaches to brain image analysis. *Artificial Intelligence in Medicine*, *30*, 177–197.  
509 doi: 10.1016/s0933-3657(03)00064-2
- 510 Marcus, D. S., Wang, T. H., Parker, J., Csernansky, J. G., Morris, J. C., & Buckner, R. L.  
511 (2007). Open Access Series of Imaging Studies (OASIS): Cross-sectional MRI data  
512 in young, middle aged, nondemented, and demented older adults. *Journal of*  
513 *Cognitive Neuroscience*, *19*, 1498–1507. doi: 10.1162/jocn.2007.19.9.1498
- 514 McGraw, K. O., & Wong, S. P. (1996). Forming inferences about some intraclass  
515 correlation coefficients. *Psychological Methods*, *1*, 30–46. doi:  
516 10.1037/1082-989x.1.1.30
- 517 McKay, D. R., Knowles, E. E. M., Winkler, A. A. M., Sprooten, E., Kochunov, P., Olvera,  
518 R. L., ... Glahn, D. C. (2014). Influence of age, sex and genetic factors on the  
519 human brain. *Brain Imaging and Behavior*, *8*, 143–152. doi:  
520 10.1007/s11682-013-9277-5
- 521 Mennes, M., Biswal, B. B., Castellanos, F. X., & Milham, M. P. (2013). Making data  
522 sharing work: The FCP/INDI experience. *NeuroImage*, *82*, 683–691. doi:  
523 10.1016/j.neuroimage.2012.10.064
- 524 Mikhael, S., Hoogendoorn, C., Valdes-Hernandez, M., & Pernet, C. (2018). A critical  
525 analysis of neuroanatomical software protocols reveals clinically relevant  
526 differences in parcellation schemes. *NeuroImage*, *170*, 348–364. doi:  
527 10.1016/j.neuroimage.2017.02.082
- 528 Ming, J., Harms, M. P., Morris, J. C., Beg, M. F., & Wang, L. (2015). Integrated cortical  
529 structural marker for Alzheimer’s disease. *Neurobiology of Aging*, *36*, S53–S59. doi:  
530 10.1016/j.neurobiolaging.2014.03.042
- 531 Nowinski, W. L., Raphel, J. K., & Nguyen, B. T. (1996). Atlas-based identification of  
532 cortical sulci. In Y. Kim (Ed.), *Medical imaging 1996: Image display*. SPIE. doi:  
533 10.1117/12.238488
- 534 Oguz, I., Cates, J., Fletcher, T., Whitaker, R., Cool, D., Aylward, S., & Styner, M. (2008).



- 535 Cortical correspondence using entropy-based particle systems and local features.  
536 In *2008 5th IEEE International Symposium on Biomedical Imaging: From nano to*  
537 *macro*. IEEE. doi: 10.1109/isbi.2008.4541327
- 538 Ono, M., Kubick, S., & Abernathy, C. D. (1990). *Atlas of the cerebral sulci*. Thieme.  
539 Retrieved from  
540 [https://www.amazon.com/Atlas-Cerebral-Sulci-Stefan-Kubik/](https://www.amazon.com/Atlas-Cerebral-Sulci-Stefan-Kubik/dp/3137321018?SubscriptionId=AKIAIOBINVZYXZQZ2U3A&tag=chimbori05-20&linkCode=xm2&camp=2025&creative=165953&creativeASIN=3137321018)  
541 [dp/3137321018?SubscriptionId=AKIAIOBINVZYXZQZ2U3A&tag=](https://www.amazon.com/Atlas-Cerebral-Sulci-Stefan-Kubik/dp/3137321018?SubscriptionId=AKIAIOBINVZYXZQZ2U3A&tag=chimbori05-20&linkCode=xm2&camp=2025&creative=165953&creativeASIN=3137321018)  
542 [chimbori05-20&linkCode=xm2&camp=2025&creative=](https://www.amazon.com/Atlas-Cerebral-Sulci-Stefan-Kubik/dp/3137321018?SubscriptionId=AKIAIOBINVZYXZQZ2U3A&tag=chimbori05-20&linkCode=xm2&camp=2025&creative=165953&creativeASIN=3137321018)  
543 [165953&creativeASIN=3137321018](https://www.amazon.com/Atlas-Cerebral-Sulci-Stefan-Kubik/dp/3137321018?SubscriptionId=AKIAIOBINVZYXZQZ2U3A&tag=chimbori05-20&linkCode=xm2&camp=2025&creative=165953&creativeASIN=3137321018)
- 544 Palaniyappan, L., Park, B., Balain, V., Dangi, R., & Liddle, P. (2015). Abnormalities in  
545 structural covariance of cortical gyrification in schizophrenia. *Brain Structure and*  
546 *Function*, 220, 2059–2071. doi: 10.1007/s00429-014-0772-2
- 547 Pasquier, F., Leys, D., Weerts, J. G., Mounier-Vehier, F., Barkhof, F., & Scheltens, P.  
548 (1996). Inter-and intraobserver reproducibility of cerebral atrophy assessment on  
549 MRI scans with hemispheric infarcts. *European Neurology*, 36, 268–272. doi:  
550 10.1159/000117270
- 551 Perrot, M., Rivière, D., & Mangin, J.-F. (2011). Cortical sulci recognition and spatial  
552 normalization. *Medical Image Analysis*, 15, 529–550. doi:  
553 10.1016/j.media.2011.02.008
- 554 Pizzagalli, F., Auzias, G., Kochunov, P., Faskowitz, J. I., Thompson, P. M., & Jahanshad,  
555 N. (2017). The core genetic network underlying sulcal morphometry. In  
556 E. Romero, N. Lepore, J. Brieva, & I. Larrabide (Eds.), *12th international symposium*  
557 *on medical information processing and analysis*. SPIE. doi: 10.1117/12.2256959
- 558 Plochanski, M., & Østergaard, L. R. (2016). Extraction of sulcal medial surface and  
559 classification of Alzheimer’s disease using sulcal features. *Computer Methods and*  
560 *Programs in Biomedicine*, 133, 35–44. doi: 10.1016/j.cmpb.2016.05.009
- 561 Rajaratnam, N. (1960). Reliability formulas for independent decision data when  
562 reliability data are matched. *Psychometrika*, 25, 261–271. doi: 10.1007/bf02289730
- 563 Reiner, P., Jouvent, E., Duchesnay, E., Cuingnet, R., Mangin, J.-F., & Chabriat, H. (2012).

- 564 Sulcal span in Alzheimer's disease, amnesic mild cognitive impairment, and  
565 healthy controls. *Journal of Alzheimer's Disease*, 29, 605–613. doi:  
566 10.3233/JAD-2012-111622
- 567 Rieder, R. O., Donnelly, E. F., Herdt, J. R., & Waldman, I. N. (1979). Sulcal prominence  
568 in young chronic schizophrenic patients: CT scan findings associated with  
569 impairment on neuropsychological tests. *Psychiatry Research*, 1, 1–8. doi:  
570 10.1016/0165-1781(79)90021-0
- 571 Rivière, D., Mangin, J.-F., Papadopoulos-Orfanos, D., Martinez, J.-M., Frouin, V., &  
572 Régis, J. (2002). Automatic recognition of cortical sulci of the human brain using  
573 a congregation of neural networks. *Medical Image Analysis*, 6, 77–92. doi:  
574 10.1016/s1361-8415(02)00052-x
- 575 Royackkers, N., Desvignes, M., Fawal, H., & Revenu, M. (1999). Detection and  
576 statistical analysis of human cortical sulci. *NeuroImage*, 10, 625–641. doi:  
577 10.1006/nimg.1999.0512
- 578 Salat, D. H., Buckner, R. L., Snyder, A. Z., Greve, D. N., Desikan, R. S. R., Busa, E., ...  
579 Fischl, B. (2004). Thinning of the cerebral cortex in aging. *Cerebral Cortex*, 14,  
580 721–730. doi: 10.1093/cercor/bhh032
- 581 Schaer, M., Cuadra, M. B., Schmansky, N., Fischl, B., Thiran, J.-P., & Eliez, S. (2012).  
582 How to measure cortical folding from MR images: A step-by-step tutorial to  
583 compute local gyrification index. *Journal of Visualized Experiments*, e3417. doi:  
584 10.3791/3417
- 585 Scheltens, P., Pasquier, F., Weerts, J. G., Barkhof, F., & Leys, D. (1997). Qualitative  
586 assessment of cerebral atrophy on MRI: Inter- and intra-observer reproducibility  
587 in dementia and normal aging. *European Neurology*, 37, 95–99. doi:  
588 10.1159/000117417
- 589 Shrout, P. E., & Fleiss, J. L. (1979). Intraclass correlations: Uses in assessing rater  
590 reliability. *Psychological Bulletin*, 86, 420–428. doi: 10.1037/0033-2909.86.2.420
- 591 Sowell, E. R., Peterson, B. S., Kan, E., Woods, R. P., Yoshii, J., Bansal, R., ... Toga, A. W.  
592 (2007). Sex differences in cortical thickness mapped in 176 healthy individuals

- 593 between 7 and 87 years of age. *Cerebral Cortex*, 17, 1550–1560. doi:  
594 10.1093/cercor/bhl066
- 595 Sowell, E. R., Peterson, B. S., Thompson, P. M., Welcome, S. E., Henkenius, A. L., &  
596 Toga, A. W. (2003). Mapping cortical change across the human life span. *Nature*  
597 *Neuroscience*, 6, 309–315. doi: 10.1038/nn1008
- 598 Tang, Y., Hojatkashani, C., Dinov, I. D., Sun, B., Fan, L., Lin, X., ... Toga, A. W. (2010).  
599 The construction of a chinese MRI brain atlas: A morphometric comparison study  
600 between chinese and caucasian cohorts. *NeuroImage*, 51, 33–41. doi:  
601 10.1016/j.neuroimage.2010.01.111
- 602 Thompson, P. M., Schwartz, C., Lin, R. T., Khan, A. A., & Toga, A. W. (1996).  
603 Three-dimensional statistical analysis of sulcal variability in the human brain.  
604 *Journal of Neuroscience*, 16, 4261–4274. doi: 10.1523/jneurosci.16-13-04261.1996
- 605 Tomlinson, B., Blessed, G., & Roth, M. (1968). Observations on the brains of  
606 non-demented old people. *Journal of the Neurological Sciences*, 7, 331–356. doi:  
607 10.1016/0022-510x(68)90154-8
- 608 Vaillant, M., & Davatzikos, C. (1997). Finding parametric representations of the cortical  
609 sulci using an active contour model. *Medical Image Analysis*, 1, 295–315. doi:  
610 10.1016/s1361-8415(97)85003-7
- 611 Walhovd, K. B., Westlye, L. T., Amlien, I., Espeseth, T., Reinvang, I., Raz, N., ... Fjell,  
612 A. M. (2011). Consistent neuroanatomical age-related volume differences across  
613 multiple samples. *Neurobiology of Aging*, 32, 916–932. doi:  
614 10.1016/j.neurobiolaging.2009.05.013
- 615 Wei, D., Zhuang, K., Chen, Q., Yang, W., Liu, W., Wang, K., ... Qiu, J. (2018). Structural  
616 and functional MRI from a cross-sectional Southwest University Adult Lifespan  
617 Dataset (SALD). *bioRxiv*. doi: 10.1101/177279
- 618 Welker, W. (1990). Why does cerebral cortex fissure and fold? In E. G. Jones &  
619 A. Peters (Eds.), *Cerebral cortex* (Vol. 8B, pp. 3–136). Springer US. doi:  
620 10.1007/978-1-4615-3824-0\_1
- 621 Yue, N. C., Arnold, A. M., Longstreth, W. T., Elster, A. D., Jungreis, C. A., O’Leary,

- 622 D. H., . . . Bryan, R. N. (1997). Sulcal, ventricular, and white matter changes at  
623 MR imaging in the aging brain: Data from the cardiovascular health study.  
624 *Radiology*, 202, 33–39. doi: 10.1148/radiology.202.1.8988189
- 625 Yun, H. J., Im, K., Yang, J.-J., Yoon, U., & Lee, J.-M. (2013). Automated sulcal depth  
626 measurement on cortical surface reflecting geometrical properties of sulci. *PLOS*  
627 *ONE*, 8, e55977. doi: 10.1371/journal.pone.0055977
- 628 Zuo, X.-N., Anderson, J. S., Bellec, P., Birn, R. M., Biswal, B. B., Blautzik, J., . . . Milham,  
629 M. P. (2014). An open science resource for establishing reliability and  
630 reproducibility in functional connectomics. *Scientific Data*, 1, 140049. doi:  
631 10.1038/sdata.2014.49
